# Supplementary material
Source: publisher figshare collection journal article supplement (https://karger.figshare.com/ndownloader/files/25673333)
Supplement: Supplementary file 1 [file 25673333]

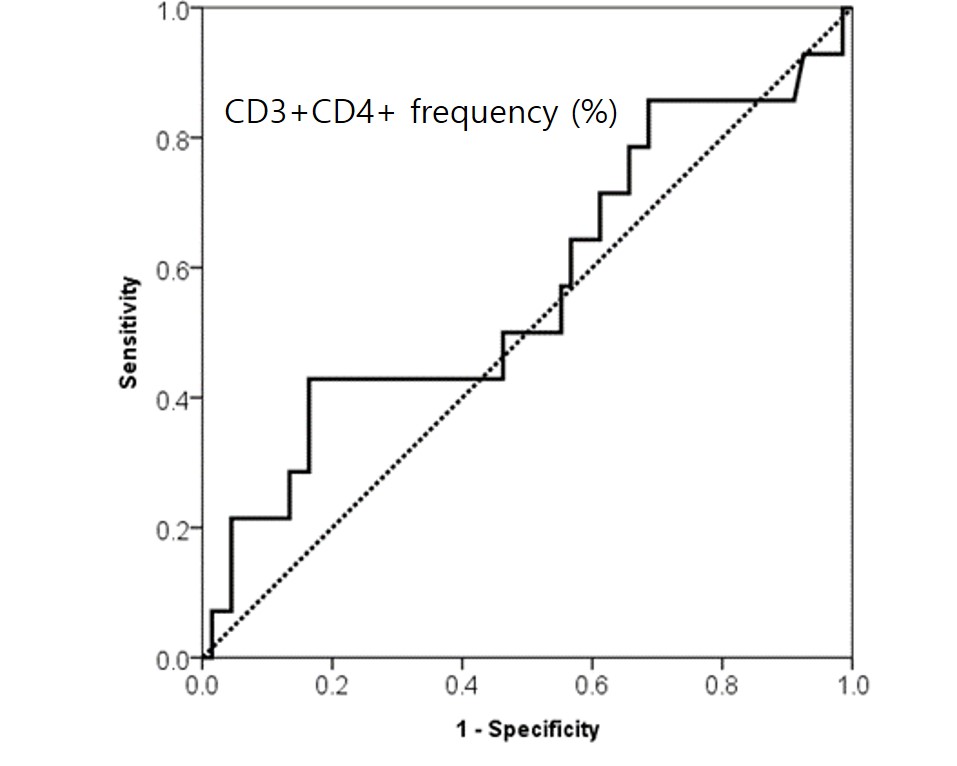


Supplement 1. ROC curve for frequency of CD3+CD4+ T-cells. The cut-off value is 47.945%, with a sensitivity of 0.429 and a specificity of 0.836.
